# Supplementary material for: Prospective quantitative gene expression analysis of kallikrein-related peptidase KLK10 as a diagnostic biomarker for childhood acute lymphoblastic leukemia
Source: PeerJ. 2022 May 31;10:e13489. doi: 10.7717/peerj.13489 (PMC9165590; doi:10.7717/peerj.13489)
Supplement: Supplemental Information 6 [file peerj-10-13489-s006.xlsx]

## Sheet: KLK10 RE Expressions
KLK10 Relative expression in controls	KLK10 RE before chemotherapy ALL patients	KLK10 RE after 1 month chemotherapy ALL patients	KLK10 RE after 3 months chemotherapy ALL patients
4.62943	0.239955	0.255401	0.532493
0.423617	0.088439	0.061675	0.148737
2.81051	0.020205	0.231781	0.590838
1.81609	0.489993	0.005605	0.244997
1.15736	0.539926	0.009426	0.406361
1.30209	0.953188	1.49571	0.061249
0.841382	0.071835	0.064741	0.356218
0.914359	0.503769	0.070357	0.248417
0.373928	0.208893	0.454022	1.25774
0.779615	0.216259	0.081947	0.444678
0.293378	1.13354	0.420691	0.312263
1.00754	0.181852	0.018852	0.210346
	0.145676	0.220803	0.722382
	0.034694	0.11589	0.651047
	0.503769	0.01333	0.547463
	0.161637	0.301626	1.53776
	0.081381	0.023371	1.10254
	0.098812	0.582703	1.10254
	0.323275	0.083669	0.528814

## Sheet: Normality Test
	KLK10 RE in controls	KLK10 RE before chemotherapy ALL patients	KLK10 RE after 1 month chemotherapy ALL patients	KLK10 RE after 3 months chemotherapy ALL patients
Test for normal distribution
Anderson-Darling test
A2*	1.055	1.251	2.096	0.7448
P value	0.0057	0.0022	<0.0001	0.0432
Passed normality test (alpha=0.05)?	No	No	No	No
P value summary	**	**	****	*
Number of values	12	19	19	19

## Sheet: Descriptive statisti
Table 3. Descriptive statistics of KLK10 mRNA expression
	KLK10 RE in controls	KLK10 RE before chemotherapy ALL patients	KLK10 RE after 1 month chemotherapy ALL patients	KLK10 RE after 3 months chemotherapy ALL patients
Number of values	12	19	19	19
Minimum	0.2934	0.02021	0.005605	0.06125
25% Percentile	0.5126	0.08844	0.02337	0.2484
Median	0.9609	0.2089	0.08367	0.5288
75% Percentile	1.688	0.5038	0.3016	0.7224
Maximum	4.629	1.134	1.496	1.538
Range	4.336	1.113	1.49	1.477
Mean	1.362	0.3156	0.2375	0.5793
Std. Deviation	1.242	0.3076	0.3487	0.404
Std. Error of Mean	0.3585	0.07058	0.07999	0.09269

## Sheet: Non-parametric tests
Table Analyzed	KLK10-Non-parametric tests
Kruskal-Wallis test
P value	<0.0001
Exact or approximate P value?	Approximate
P value summary	****
Do the medians vary signif. (P < 0.05)?	Yes
Number of groups	4
Kruskal-Wallis statistic	25.51
Data summary
Number of treatments (columns)	4
Number of values (total)	69
Table Analyzed	KLK10-Non-parametric tests
Column A	Controls
vs.	vs.
Column B	Before chemotherapy
Mann Whitney test
P value	0.0001
Exact or approximate P value?	Exact
P value summary	***
Significantly different (P < 0.05)?	Yes
One- or two-tailed P value?	Two-tailed
Sum of ranks in column A	B	280	216
Mann-Whitney U	26
Difference between medians
Median of column A	0.9609	n=12
Median of column B	0.2089	n=19
Difference: Actual	0.7521
Difference: Hodges-Lehmann	0.7375
Table Analyzed	KLK10-Non-parametric tests
Column A	Controls
vs.	vs.
Column C	After 1 month chemotherapy
Mann Whitney test
P value	<0.0001
Exact or approximate P value?	Exact
P value summary	****
Significantly different (P < 0.05)?	Yes
One- or two-tailed P value?	Two-tailed
Sum of ranks in column A	C	288	208
Mann-Whitney U	18
Difference between medians
Median of column A	0.9609	n=12
Median of column C	0.08367	n=19
Difference: Actual	0.8773
Difference: Hodges-Lehmann	0.8082
Table Analyzed	KLK10-Non-parametric tests
Column A	Controls
vs.	vs.
Column D	After 3 months chemotherapy
Mann Whitney test
P value	0.0175
Exact or approximate P value?	Exact
P value summary	*
Significantly different (P < 0.05)?	Yes
One- or two-tailed P value?	Two-tailed
Sum of ranks in column A	D	250	246
Mann-Whitney U	56
Difference between medians
Median of column A	0.9609	n=12
Median of column D	0.5288	n=19
Difference: Actual	0.4321
Difference: Hodges-Lehmann	0.4819
Table Analyzed	KLK10-Non-parametric tests
Column B	Before chemotherapy
vs.	vs.
Column C	After 1 month chemotherapy
Wilcoxon matched-pairs signed rank test
P value	0.4413
Exact or approximate P value?	Exact
P value summary	ns
Significantly different (P < 0.05)?	No
One- or two-tailed P value?	Two-tailed
Sum of positive	negative ranks	115	-75
Sum of signed ranks (W)	40
Number of pairs	19
Number of ties (ignored)	0
Median of differences
Median	0.02676
How effective was the pairing?
rs (Spearman)	-0.02545
P value (one tailed)	0.4588
P value summary	ns
Was the pairing significantly effective?	No
Table Analyzed	KLK10-Non-parametric tests
Column B	Before chemotherapy
vs.	vs.
Column D	After 3 months chemotherapy
Wilcoxon matched-pairs signed rank test
P value	0.0602
Exact or approximate P value?	Exact
P value summary	ns
Significantly different (P < 0.05)?	No
One- or two-tailed P value?	Two-tailed
Sum of positive	negative ranks	48	-142
Sum of signed ranks (W)	-94
Number of pairs	19
Number of ties (ignored)	0
Median of differences
Median	-0.2284
How effective was the pairing?
rs (Spearman)	-0.4399
P value (one tailed)	0.0297
P value summary	*
Was the pairing significantly effective?	Yes
Table Analyzed	KLK10-Non-parametric tests
Column C	After 1 month chemotherapy
vs.	vs.
Column D	After 3 months chemotherapy
Wilcoxon matched-pairs signed rank test
P value	0.0017
Exact or approximate P value?	Exact
P value summary	**
Significantly different (P < 0.05)?	Yes
One- or two-tailed P value?	Two-tailed
Sum of positive	negative ranks	21	-169
Sum of signed ranks (W)	-148
Number of pairs	19
Number of ties (ignored)	0
Median of differences
Median	-0.3627
How effective was the pairing?
rs (Spearman)	0.3379
P value (one tailed)	0.0786
P value summary	ns
Was the pairing significantly effective?	No

## Sheet: Table 2 and Table-4 Data
Table 2 and Table-4 Data
KLK10 RE before chemotherapy ALL patients	KLK10 mRNA	Age	Lymphocytes count	WBC	LDH
		3	9.6	10.7	864
		3	8.6	9.2
0.239955	0.239955	5	19.452	20.1	1024
0.088439	0.088439	14	0.786	3.6	1289
0.020205	0.020205	8	1.1	4	2479
0.489993	0.489993	6	1.751	2.04	960
0.539926	0.539926	1	19.1	37.9
0.953188	0.953188	4	1	1	662
0.071835	0.071835	4	37.7	43.5	891
0.503769	0.503769	15	1.5	2.3	1721
0.208893	0.208893	2	4.1	5.5	942
0.216259	0.216259	9	0.5	1.1	1162
1.13354	1.13354	7	1.3	3.5
0.181852	0.181852	9	1.6	2.1
0.145676	0.145676	1	8.6	13.6	418
0.034694	0.034694	5	1.4	3.1	2230
0.503769	0.503769	3	4.9	5.5	502
0.161637	0.161637	2	1.9	2.2	454
0.081381	0.081381	15	4.9	20.8	722
0.098812	0.098812	4	7.8	9.3	563
0.323275	0.323275	15	1	2.9	5568
		7	2.3	3.1	996
		10	26.5	45	974
Descriptive statistics of ALL patients
	KLK10 mRNA	Age	Lymphocytes count	WBC	LDH
Number of values	19	23	23	23	19
Minimum	0.02021	1	0.5	1	418
25% Percentile	0.08844	3	1.3	2.3	662
Median	0.2089	5	2.3	4	960
75% Percentile	0.5038	9	8.6	13.6	1289
Maximum	1.134	15	37.7	45	5568
Range	1.113	14	37.2	44	5150
Mean	0.3156	6.609	7.278	10.96	1285
Std. Deviation	0.3076	4.58	9.627	13.57	1177
Std. Error of Mean	0.07058	0.955	2.007	2.829	270.1

## Sheet: Table 4-Correlation
Table 4: Correlations between KLK10 expression and the continuous variables in newly diagnosed ALL patients.
r value
	KLK10 mRNA	Age	Lymphocytes count	WBC	LDH
KLK10 mRNA	1	-0.0908701	-0.100571	-0.31475	-0.14128
Age	-0.0908701	1	-0.48188	-0.259371	0.713098
Lymphocytes count	-0.100571	-0.48188	1	0.830324	-0.499561
WBC	-0.31475	-0.259371	0.830324	1	-0.239684
LDH	-0.14128	0.713098	-0.499561	-0.239684	1
p value
	KLK10 mRNA	Age	Lymphocytes count	WBC	LDH
KLK10 mRNA		0.711405	0.682056	0.189359	0.599164
Age	0.711405		0.0198918	0.23204	0.000609628
Lymphocytes count	0.682056	0.0198918		9.46e-07	0.0294228
WBC	0.189359	0.23204	9.46e-07		0.322988
LDH	0.599164	0.000609628	0.0294228	0.322988
95% CV
	KLK10 mRNA	Age	Lymphocytes count	WBC	LDH
KLK10 mRNA		-0.5339 to 0.3913	-0.5409 to 0.3830	-0.6806 to 0.1768	-0.6056 to 0.3948
Age	-0.5339 to 0.3913		-0.7516 to -0.07408	-0.6148 to 0.1837	0.3705 to 0.8849
Lymphocytes count	-0.5409 to 0.3830	-0.7516 to -0.07408		0.6279 to 0.9275	-0.7830 to -0.04422
WBC	-0.6806 to 0.1768	-0.6148 to 0.1837	0.6279 to 0.9275		-0.6345 to 0.2543
LDH	-0.6056 to 0.3948	0.3705 to 0.8849	-0.7830 to -0.04422	-0.6345 to 0.2543

## Sheet: Logistic regression Data
KLK10 RE	ALL present
4.62943	0
0.423617	0
2.81051	0
1.81609	0
1.15736	0
1.30209	0
0.841382	0
0.914359	0
0.373928	0
0.779615	0
0.293378	0
1.00754	0
0.239955	1
0.088439	1
0.020205	1
0.489993	1
0.539926	1
0.953188	1
0.071835	1
0.503769	1
0.208893	1
0.216259	1
1.13354	1
0.181852	1
0.145676	1
0.034694	1
0.503769	1
0.161637	1
0.081381	1
0.098812	1
0.323275	1

## Sheet: Logistic regression analysis
Simple logistic regression of KLK10
	ALL present
Best-fit values
β0	2.744
β1	-3.779
X at 50%	0.7261
Std. Error
β0	0.9282
β1	1.389
X at 50%	0.1447
95% CI (profile likelihood)
β0	1.176 to 4.931
β1	-7.030 to -1.470
X at 50%	0.4764 to 1.162
Odds ratios
β0	15.55
β1	0.02285
95% CI (profile likelihood) for odds ratios
β0	3.241 to 138.5
β1	0.0008851 to 0.2299
Is slope significantly non-zero?
|Z|	2.722
P value	0.0065
Deviation from zero?	Significant
Area under the ROC curve
Area	0.886
Std. Error	0.05816
95% confidence interval	0.7720 to 1.000
P value	0.0004
Equation	log odds = 2.744-3.779*X
Data summary
Rows in table	31
Rows skipped (missing data)	0
Rows analyzed (#observations)	31
Number of 1	19
Number of 0	12
Number of parameter estimates	2
#observations/#parameters	15.5
# of 1/#parameters	9.5
# of 0/#parameters	6

## Sheet: ROC curve for KLK10 m
Figure 2. ROC curve for KLK10 mRNA expression
Area under the ROC curve
Area	0.886
Std. Error	0.05816
95% confidence interval	0.7720 to 1.000
P value	0.0004
Data
Controls (KLK10 RE in controls)	12
Patients (KLK10 RE before chemotherapy ALL patients)	19
Missing Controls	0
Missing Patients	0
	Sensitivity%	95% CI	Specificity%	95% CI	Likelihood ratio
< 0.02745	5.263	0.2700% to 24.64%	100	75.75% to 100.0%
< 0.05326	10.53	1.870% to 31.39%	100	75.75% to 100.0%
< 0.07661	15.79	5.520% to 37.57%	100	75.75% to 100.0%
< 0.08491	21.05	8.508% to 43.33%	100	75.75% to 100.0%
< 0.09363	26.32	11.81% to 48.79%	100	75.75% to 100.0%
< 0.1222	31.58	15.36% to 53.99%	100	75.75% to 100.0%
< 0.1537	36.84	19.15% to 58.96%	100	75.75% to 100.0%
< 0.1717	42.11	23.14% to 63.72%	100	75.75% to 100.0%
< 0.1954	47.37	27.33% to 68.29%	100	75.75% to 100.0%
< 0.2126	52.63	31.71% to 72.67%	100	75.75% to 100.0%
< 0.2281	57.89	36.28% to 76.86%	100	75.75% to 100.0%
< 0.2667	63.16	41.04% to 80.85%	100	75.75% to 100.0%
< 0.3083	63.16	41.04% to 80.85%	91.67	64.61% to 99.57%	7.579
< 0.3486	68.42	46.01% to 84.64%	91.67	64.61% to 99.57%	8.211
< 0.3988	68.42	46.01% to 84.64%	83.33	55.20% to 97.04%	4.105
< 0.4568	68.42	46.01% to 84.64%	75	46.77% to 91.11%	2.737
< 0.4969	73.68	51.21% to 88.19%	75	46.77% to 91.11%	2.947
< 0.5218	84.21	62.43% to 94.48%	75	46.77% to 91.11%	3.368
< 0.6598	89.47	68.61% to 98.13%	75	46.77% to 91.11%	3.579
< 0.8105	89.47	68.61% to 98.13%	66.67	39.06% to 86.19%	2.684
< 0.8779	89.47	68.61% to 98.13%	58.33	31.95% to 80.67%	2.147
< 0.9338	89.47	68.61% to 98.13%	50	25.38% to 74.62%	1.789
< 0.9804	94.74	75.36% to 99.73%	50	25.38% to 74.62%	1.895
< 1.071	94.74	75.36% to 99.73%	41.67	19.33% to 68.05%	1.624
< 1.145	100	83.18% to 100.0%	41.67	19.33% to 68.05%	1.714
< 1.230	100	83.18% to 100.0%	33.33	13.81% to 60.94%	1.5
< 1.559	100	83.18% to 100.0%	25	8.894% to 53.23%	1.333
< 2.313	100	83.18% to 100.0%	16.67	2.961% to 44.80%	1.2
< 3.720	100	83.18% to 100.0%	8.333	0.4274% to 35.39%	1.091
