# Supplementary material for: Prospective quantitative gene expression analysis of kallikrein-related peptidase KLK10 as a diagnostic biomarker for childhood acute lymphoblastic leukemia
Source: PeerJ. 2022 May 31;10:e13489. doi: 10.7717/peerj.13489 (PMC9165590; doi:10.7717/peerj.13489)
Supplement: Supplemental Information 7 [file peerj-10-13489-s007.xlsx]

## Sheet: KLK10 RE in B-ALL
KLK10 RE in controls	KLK10 RE before chemotherapy B-ALL patients	KLK10 RE after 1 month chemotherapy B-ALL patients	KLK10 RE after 3 months chemotherapy B-ALL patients
4.62943	0.239955	0.255401	0.532493
0.423617	0.088439	0.061675	0.148737
2.81051	0.489993	0.005605	0.244997
1.81609	0.539926	0.009426	0.406361
1.15736	0.953188	1.49571	0.061249
1.30209	0.071835	0.064741	0.356218
0.841382	0.208893	0.454022	1.25774
0.914359	0.216259	0.081947	0.444678
0.373928	1.13354	0.420691	0.312263
0.779615	0.181852	0.018852	0.210346
0.293378	0.145676	0.220803	0.722382
1.00754	0.503769	0.01333	0.547463
	0.161637	0.301626	1.53776
	0.081381	0.023371	1.10254
	0.098812	0.582703	1.10254

## Sheet: Sup Table S1
Supplementary Table S1 KLK10 mRNA expression analysis in B-ALL patients and normal controls
	KLK10 RE in controls	KLK10 RE before chemotherapy B-ALL patients	KLK10 RE after 1 month chemotherapy B-ALL patients	KLK10 RE after 3 months chemotherapy B-ALL patients
Number of values	12	15	15	15
Minimum	0.2934	0.07184	0.005605	0.06125
25% Percentile	0.5126	0.09881	0.01885	0.245
Median	0.9609	0.2089	0.08195	0.4447
75% Percentile	1.688	0.5038	0.4207	1.103
Maximum	4.629	1.134	1.496	1.538
Range	4.336	1.062	1.49	1.477
Mean	1.362	0.341	0.2673	0.5992
Std. Deviation	1.242	0.3265	0.3881	0.4484
Std. Error of Mean	0.3585	0.0843	0.1002	0.1158

## Sheet: KLK10 RE in T-ALL
KLK10 RE in controls	KLK10 RE before chemotherapy T-ALL patients	KLK10 RE after 1 month chemotherapy T-ALL patients	KLK10 RE after 3 months chemotherapy T-ALL patients
4.62943	0.020205	0.231781	0.590838
0.423617	0.503769	0.070357	0.248417
2.81051	0.034694	0.11589	0.651047
1.81609	0.323275	0.083669	0.528814
1.15736
1.30209
0.841382
0.914359
0.373928
0.779615
0.293378
1.00754

## Sheet: Sup Table S2
Supplementary Table S2 KLK10 mRNA expression analysis in T-ALL patients and normal controls
	KLK10 RE in controls	KLK10 RE before chemotherapy T-ALL patients	KLK10 RE after 1 month chemotherapy T-ALL patients	KLK10 RE after 3 months chemotherapy T-ALL patients
Number of values	12	4	4	4
Minimum	0.2934	0.02021	0.07036	0.2484
25% Percentile	0.5126	0.02383	0.07369	0.3185
Median	0.9609	0.179	0.09978	0.5598
75% Percentile	1.688	0.4586	0.2028	0.636
Maximum	4.629	0.5038	0.2318	0.651
Range	4.336	0.4836	0.1614	0.4026
Mean	1.362	0.2205	0.1254	0.5048
Std. Deviation	1.242	0.2348	0.07344	0.178
Std. Error of Mean	0.3585	0.1174	0.03672	0.08902

## Sheet: Sup Figure S1
Sup Figure S1. Bar-graph of KLK10 mRNA expression in the cohort at diagnosis.
Controls	ALL diagnosis	B-ALL diagnosis	T-ALL diagnosis
4.62943	0.239955	0.239955	0.020205
0.423617	0.088439	0.088439	0.503769
2.81051	0.020205	0.489993	0.034694
1.81609	0.489993	0.539926	0.323275
1.15736	0.539926	0.953188
1.30209	0.953188	0.071835
0.841382	0.071835	0.208893
0.914359	0.503769	0.216259
0.373928	0.208893	1.13354
0.779615	0.216259	0.181852
0.293378	1.13354	0.145676
1.00754	0.181852	0.503769
	0.145676	0.161637
	0.034694	0.081381
	0.503769	0.098812
	0.161637
	0.081381
	0.098812
	0.323275
Table Analyzed	Sup Figure 1. Bar-graph of KLK10 mRNA expression in the cohort at diagnosis.
Column A	Controls
vs.	vs.
Column B	ALL diagnosis
Mann Whitney test
P value	0.0001
Exact or approximate P value?	Exact
P value summary	***
Significantly different (P < 0.05)?	Yes
One- or two-tailed P value?	Two-tailed
Sum of ranks in column A,B	280 , 216
Mann-Whitney U	26
Difference between medians
Median of column A	0.9609, n=12
Median of column B	0.2089, n=19
Difference: Actual	0.7521
Difference: Hodges-Lehmann	0.7375
Table Analyzed	Sup Figure 1. Bar-graph of KLK10 mRNA expression in the cohort at diagnosis.
Column A	Controls
vs.	vs.
Column C	B-ALL diagnosis
Mann Whitney test
P value	0.0005
Exact or approximate P value?	Exact
P value summary	***
Significantly different (P < 0.05)?	Yes
One- or two-tailed P value?	Two-tailed
Sum of ranks in column A,C	236 , 142
Mann-Whitney U	22
Difference between medians
Median of column A	0.9609, n=12
Median of column C	0.2089, n=15
Difference: Actual	0.7521
Difference: Hodges-Lehmann	0.7019
Table Analyzed	Sup Figure 1. Bar-graph of KLK10 mRNA expression in the cohort at diagnosis.
Column A	Controls
vs.	vs.
Column D	T-ALL diagnosis
Mann Whitney test
P value	0.0132
Exact or approximate P value?	Exact
P value summary	*
Significantly different (P < 0.05)?	Yes
One- or two-tailed P value?	Two-tailed
Sum of ranks in column A,D	122 , 14
Mann-Whitney U	4
Difference between medians
Median of column A	0.9609, n=12
Median of column D	0.1790, n=4
Difference: Actual	0.782
Difference: Hodges-Lehmann	0.8025

## Sheet: Sup Figure S2
Sup Figure S2. Bar-graph of KLK10 mRNA expression after one month chemotherapy
Controls	KLK10 RE after 1 month chemotherapy ALL patients	KLK10 RE after 1 month chemotherapy B-ALL patients	KLK10 RE after 1 month chemotherapy T-ALL patients
4.62943	0.255401	0.255401	0.231781
0.423617	0.061675	0.061675	0.070357
2.81051	0.231781	0.005605	0.11589
1.81609	0.005605	0.009426	0.083669
1.15736	0.009426	1.49571
1.30209	1.49571	0.064741
0.841382	0.064741	0.454022
0.914359	0.070357	0.081947
0.373928	0.454022	0.420691
0.779615	0.081947	0.018852
0.293378	0.420691	0.220803
1.00754	0.018852	0.01333
	0.220803	0.301626
	0.11589	0.023371
	0.01333	0.582703
	0.301626
	0.023371
	0.582703
	0.083669
Table Analyzed	Sup Figure 2. Bar-graph of KLK10 mRNA expression after one month chemotherapy
Column A	Controls
vs.	vs.
Column B	KLK10 RE after 1 month chemotherapy ALL patients
Mann Whitney test
P value	<0.0001
Exact or approximate P value?	Exact
P value summary	****
Significantly different (P < 0.05)?	Yes
One- or two-tailed P value?	Two-tailed
Sum of ranks in column A,B	288 , 208
Mann-Whitney U	18
Difference between medians
Median of column A	0.9609, n=12
Median of column B	0.08367, n=19
Difference: Actual	0.8773
Difference: Hodges-Lehmann	0.8082
Table Analyzed	Sup Figure 2. Bar-graph of KLK10 mRNA expression after one month chemotherapy
Column A	Controls
vs.	vs.
Column C	KLK10 RE after 1 month chemotherapy B-ALL patients
Mann Whitney test
P value	0.0002
Exact or approximate P value?	Exact
P value summary	***
Significantly different (P < 0.05)?	Yes
One- or two-tailed P value?	Two-tailed
Sum of ranks in column A,C	240 , 138
Mann-Whitney U	18
Difference between medians
Median of column A	0.9609, n=12
Median of column C	0.08195, n=15
Difference: Actual	0.879
Difference: Hodges-Lehmann	0.7832
Table Analyzed	Sup Figure 2. Bar-graph of KLK10 mRNA expression after one month chemotherapy
Column A	Controls
vs.	vs.
Column D	KLK10 RE after 1 month chemotherapy T-ALL patients
Mann Whitney test
P value	0.0011
Exact or approximate P value?	Exact
P value summary	**
Significantly different (P < 0.05)?	Yes
One- or two-tailed P value?	Two-tailed
Sum of ranks in column A,D	126 , 10
Mann-Whitney U	0
Difference between medians
Median of column A	0.9609, n=12
Median of column D	0.09978, n=4
Difference: Actual	0.8612
Difference: Hodges-Lehmann	0.8373

## Sheet: Sup Figure S3
Sup Figure S3. Bar-graph of KLK10 mRNA expression after three months chemotherapy
Controls	KLK10 RE after 3 months chemotherapy ALL patients	KLK10 RE after 3 months chemotherapy B-ALL patients	KLK10 RE after 3 months chemotherapy T-ALL patients
4.62943	0.532493	0.532493	0.590838
0.423617	0.148737	0.148737	0.248417
2.81051	0.590838	0.244997	0.651047
1.81609	0.244997	0.406361	0.528814
1.15736	0.406361	0.061249
1.30209	0.061249	0.356218
0.841382	0.356218	1.25774
0.914359	0.248417	0.444678
0.373928	1.25774	0.312263
0.779615	0.444678	0.210346
0.293378	0.312263	0.722382
1.00754	0.210346	0.547463
	0.722382	1.53776
	0.651047	1.10254
	0.547463	1.10254
	1.53776
	1.10254
	1.10254
	0.528814
Table Analyzed	Sup Figure 3. Bar-graph of KLK10 mRNA expression after three months chemoth
Column A	Controls
vs.	vs.
Column B	KLK10 RE after 3 months chemotherapy ALL patients
Mann Whitney test
P value	0.0175
Exact or approximate P value?	Exact
P value summary	*
Significantly different (P < 0.05)?	Yes
One- or two-tailed P value?	Two-tailed
Sum of ranks in column A,B	250 , 246
Mann-Whitney U	56
Difference between medians
Median of column A	0.9609, n=12
Median of column B	0.5288, n=19
Difference: Actual	0.4321
Difference: Hodges-Lehmann	0.4819
Table Analyzed	Sup Figure 3. Bar-graph of KLK10 mRNA expression after three months chemoth
Column A	Controls
vs.	vs.
Column C	KLK10 RE after 3 months chemotherapy B-ALL patients
Mann Whitney test
P value	0.0354
Exact or approximate P value?	Exact
P value summary	*
Significantly different (P < 0.05)?	Yes
One- or two-tailed P value?	Two-tailed
Sum of ranks in column A,C	211 , 167
Mann-Whitney U	47
Difference between medians
Median of column A	0.9609, n=12
Median of column C	0.4447, n=15
Difference: Actual	0.5163
Difference: Hodges-Lehmann	0.4801
Table Analyzed	Sup Figure 3. Bar-graph of KLK10 mRNA expression after three months chemoth
Column A	Controls
vs.	vs.
Column D	KLK10 RE after 3 months chemotherapy T-ALL patients
Mann Whitney test
P value	0.078
Exact or approximate P value?	Exact
P value summary	ns
Significantly different (P < 0.05)?	No
One- or two-tailed P value?	Two-tailed
Sum of ranks in column A,D	117 , 19
Mann-Whitney U	9
Difference between medians
Median of column A	0.9609, n=12
Median of column D	0.5598, n=4
Difference: Actual	0.4011
Difference: Hodges-Lehmann	0.4925
